# Supplementary material for: Caerulomycin and collismycin antibiotics share a trans-acting flavoprotein-dependent assembly line for 2,2’-bipyridine formation
Source: PubMed Central journal article supplement (PMC8149447; doi:10.1038/s41467-021-23475-4), 2021-05-25
Supplement: 41467_2021_23475_MOESM2_ESM.pdf [file 41467_2021_23475_MOESM2_ESM.pdf]

Editorial Note: This manuscript has been previously reviewed at another journal that is not operating a transparent peer review scheme. This document only contains reviewer comments and rebuttal letters for versions considered at *Nature Communications*.

Reviewers' Comments:

Reviewer #1:

Remarks to the Author:

The manuscript by Pang et al. describes the investigation of the assembly lines for the biosynthesis of the related NRPS-PKS hybrids collismycin and caerulomycin. In the third, vastly improved version of this manuscript, the authors have meticulously addressed all concerns and I therefore support publication of this work. Below are a few minor points that should be considered prior to publication.

Minor points:

p. 4, line 62: Correct "malonyl-S-CoA" to "malonyl-CoA" (several times in the manuscript) as previously pointed out.

p.4 lines 69 & 75: "lacks precedent" and "unprecedented" is repetitive. I suggest to use "unprecedented" not more than once.

p. 6, line 109: "type II" with small letter

p. 13, first paragraph: "This assay led to the production of the + 1Da derivative of 1 (Supplementary Fig. 17), which excludes route b in which cyclization precedes dethiolation. As shown in this route, cyclization requires the epimerization of 12 to the enamine, which could eliminate the C $\beta$  deuterium of the dehydrocysteinyI residue and result in unlabeled 1."

Notably, the production of the +1 derivative does not strictly rule out route b, as the deuterium would also be re-introduced during conversion of 14 into 9; however, in this case the reductive desulfuration would be less likely to occur due to the more stable and less reactive aromatic pyridine ring system and therefore route a appears more likely. Please adjust the text section accordingly. Moreover as the deuterium is re-introduced, please rephrase the next section. For example write: "Instead, route c is favored based on this observation because the reductive dethiolation of 12 to picolinyl-acetyl-dehydroalanyl-S-CaeA2 (13) mediated by CaeB1 reintroduces the previously abstracted deuterium at C $\beta$  and thus facilitates cyclization to afford 2,2'-bipyridinyl (Fig. 5)."

## Response to Decision Letter

We would like to thank the reviewers and the editorial staff for taking the time to evaluate the manuscript, which has certainly improved as a result of the feedback. Below, we provide a point-by-point response to each comment with the reviewer's text in black and our response in blue.

p. 4, line 62: Correct "malonyl-S-CoA" to "malonyl-CoA" (several times in the manuscript) as previously pointed out.

Done.

p. 4, lines 69 & 75: "lacks precedent" and "unprecedented" is repetitive. I suggest to use "unprecedented" not more than once.

We have deleted the word "unprecedented" as the reviewer suggested.

p. 6, line 109: "type II" with small letter

Done.

p. 13, first paragraph: "This assay led to the production of the + 1Da derivative of 1 (Supplementary Fig. 17), which excludes route b in which cyclization precedes dethiolation. As shown in this route, cyclization requires the epimerization of 12 to the enamine, which could eliminate the C $\beta$  deuterium of the dehydrocysteinyll residue and result in unlabeled 1."

Notably, the production of the +1 derivative does not strictly rule out route b, as the deuterium would also be re-introduced during conversion of 14 into 9; however, in this case the reductive desulfuration would be less likely to occur due to the more stable and less reactive aromatic pyridine ring system and therefore route a appears more likely. Please adjust the text section accordingly. Moreover as the deuterium is re-introduced, please rephrase the next section. For example write: "Instead, route c is favored based on this observation because the reductive dethiolation of 12 to picolinyl-acetyl-dehydroalanyl-S-CaeA2 (13) mediated by CaeB1 reintroduces the previously abstracted deuterium at C $\beta$  and thus facilitates cyclization to afford

2,2'-bipyridinyl (Fig. 5).”

We have revised related sentences as the reviewer suggested. Please see Page 12 in the revised manuscript.
